# Supplementary material for: The nodD1 Gene of Sinorhizobium fredii HH103 Restores Nodulation Capacity on Bean in a Rhizobium tropici CIAT 899 nodD1/nodD2 Mutant, but the Secondary Symbiotic Regulators nolR, nodD2 or syrM Prevent HH103 to Nodulate with This Legume
Source: MDPI journal article supplement (doi:10.3390/microorganisms10010139), 2022-01-10
Supplement: s1 [file s1]

# **The *nodD1* gene of *Sinorhizobium fredii* HH103 restores nodulation capacity on bean in a *Rhizobium tropici* CIAT 899 *nodD1 nodD2* mutant, but the secondary symbiotic regulators *nolR*, *nodD2* or *syrM* prevent HH103 to nodulate with this legume**

Francisco Fuentes-Romero, Pilar Navarro-Gómez, Paula Ayala-García, Isamar Moyano-Bravo, Francisco-Javier López-Baena, Francisco Pérez-Montaño, Francisco-Javier Ollero-Márquez, Sebastián Acosta-Jurado \*, José María Vinardell González,\*

## **List of Supplementary Material**

**Figure S1.** Nodule primordia (panel A) and lateral roots (panel B) on *Phaseolus vulgaris* roots. Photos on the left were taken under a Leica microscope (100x). Photos on the right were taken under a binocular loupe (bars correspond to 0.5 cm).

**Figure S2.** Symbiotic performance of *R. tropici* CIAT 899, *S. fredii* HH103 and its *nodD2*, *nolR*, *syrM*, and *ttsI* derivatives with *Phaseolus vulgaris*. Appearance of roots.

**Table S1.** Bacterial strains and plasmids used in this work.

**Dataset S1.** List and areas of Nod factors produced by *R. tropici* CIAT 899, CIAT 899  $\Delta nodD1D2$ , and CIAT 899  $\Delta nodD1D2$  (pMUS296) upon induction with apigenin. Nod factors produced by CIAT 899 in the absence of flavonoids are also shown.

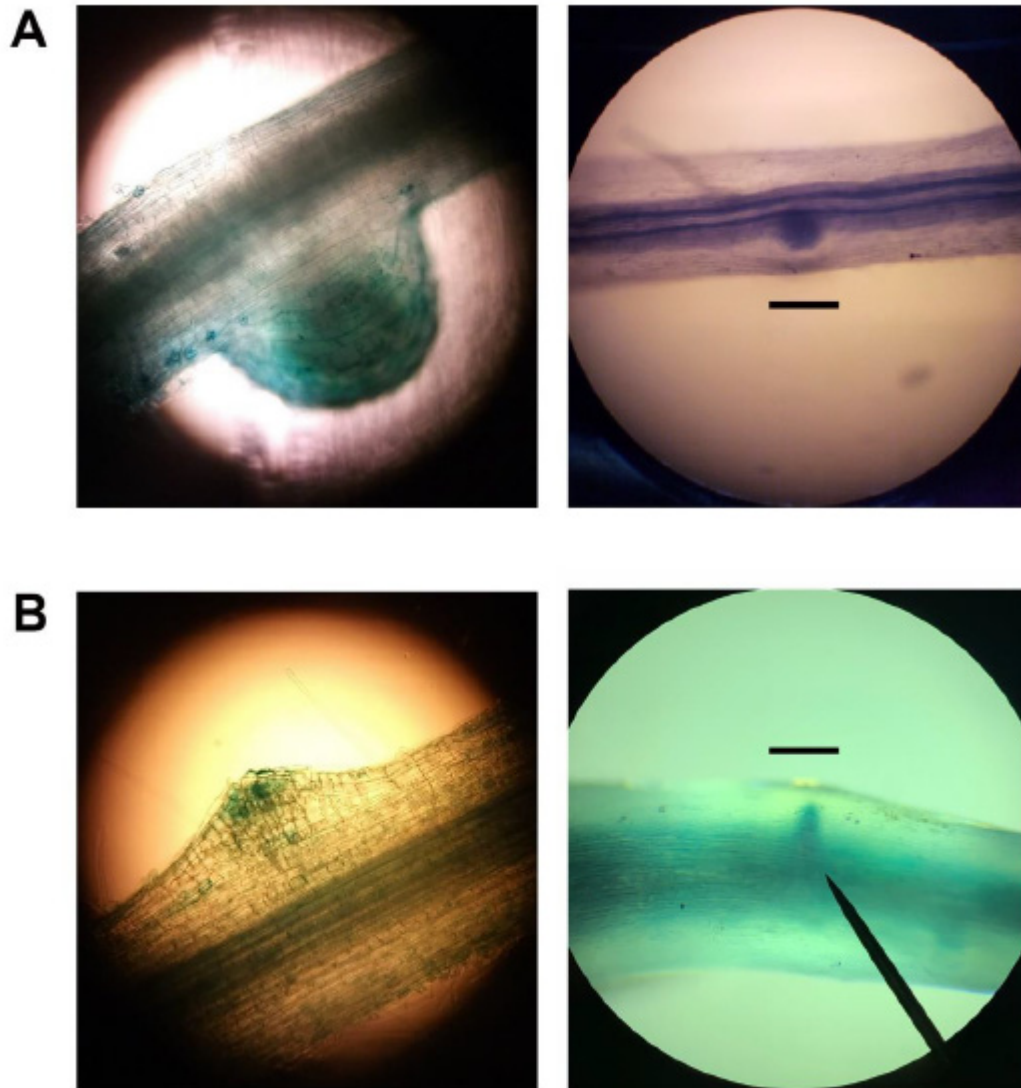

**Figure S1.** Nodule primordia (panel A) and lateral roots (panel B) on *Phaseolus vulgaris* roots. Photos on the left were taken under a Leica BioMed (Germany) microscope (100x). Photos on the right were taken under a Optika SZN 4 (Italy) binocular loupe (bars correspond to 0.5 cm).

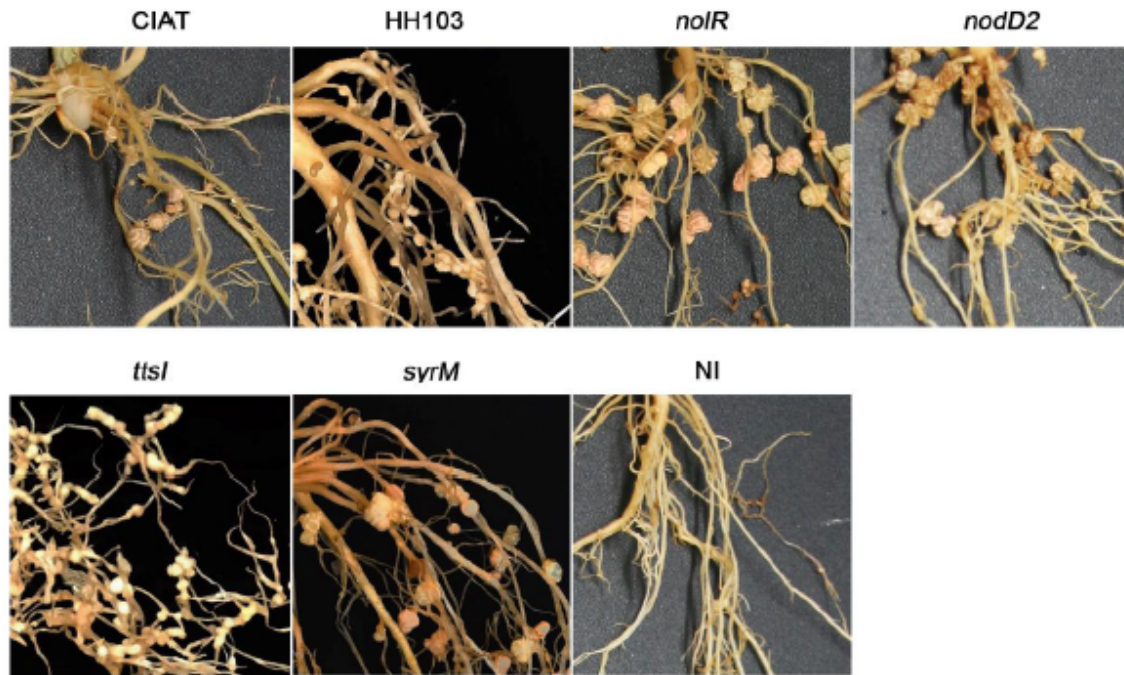

**Figure S2.** Symbiotic performance of *R. tropici* CIAT 899, *S. fredii* HH103 and its *nodD2*, *nolR*, *syrM*, and *ttsI* derivatives with *Phaseolus vulgaris*. Appearance of roots.

**Table S1.** Bacterial strains and plasmids used in this work.

| Strain                               | Derivation and relevant properties <sup>a</sup>                              | Source or reference |
|--------------------------------------|------------------------------------------------------------------------------|---------------------|
| <i>Rhizobium tropici</i>             |                                                                              |                     |
| CIAT 899                             | Wild-type strain (Rif <sup>r</sup> )                                         | [1]                 |
| CIAT 899 $\Delta nodD1 \Delta nodD2$ | CIAT 899 $\Delta nodD1 \Delta nodD2$                                         | [2]                 |
| <i>Sinorhizobium fredii</i>          |                                                                              |                     |
| HH103 Rif <sup>r</sup>               | Spontaneous Rif <sup>r</sup> derivative of HH103                             | [3]                 |
| HH103 Rif <sup>r</sup> <i>nodD2</i>  | HH103 Rif <sup>r</sup> <i>nodD2</i> ::                                       | [4]                 |
| HH103 Rif <sup>r</sup> <i>nolR</i>   | HH103 Rif <sup>r</sup> <i>nolR</i> :: <i>lacZ</i> $\Delta$ p-GmR             | [5]                 |
| HH103 Rif <sup>r</sup> <i>syrM</i>   | HH103 Rif <sup>r</sup> $\Delta$ <i>syrM</i>                                  | [6]                 |
| HH103 Rif <sup>r</sup> <i>ttsI</i>   | HH103 Rif <sup>r</sup> <i>ttsI</i> ::                                        | [4]                 |
| Plasmids                             |                                                                              |                     |
| pMUS296                              | Broad host range plasmid pMP92 carrying HH103 <i>nodD1</i> , T <sub>CR</sub> | [7]                 |
| pMUS746                              | pMP92 carrying HH103 <i>nodD2</i> , T <sub>CR</sub>                          | [4]                 |
| pRK2013                              | Helper plasmid, KmR                                                          | [8]                 |

## References

- Martínez-Romero, E.; Segovia, L.; Mercante, F.M.; Franco, A.A.; Graham, P.; Pardo, M.A. *Rhizobium tropici*, a novel species nodulating *Phaseolus vulgaris* L. beans and *Leucaena* sp. trees. *Int. J. Syst. Bacteriol.* **1991**, *41*, 417–426. <https://doi.org/10.1099/00207713-41-3-417>.
- del Cerro, P.; Pérez-Montañó, F.; Gil-Serrano, A.; López-Baena, F.J.; Megías, M.; Hungria, M.; Ollero, F.J. The *Rhizobium tropici* CIAT 899 NodD2 protein regulates the production of Nod factors under salt stress in a flavonoid independent manner. *Sci. Rep.* **2017**, *7*, 46712. <https://doi.org/10.1038/srep46712>.
- Madinabeitia, N.; Bellogín, R.A.; Buendía-Clavería, A.M.; Camacho, M.; Cubo, T.; Espuny, M.R.; Gil-Serrano, A.M.; Lyra, M.C.; Moussaid, A.; Ollero, F.J.; et al. *Sinorhizobium fredii* HH103 has a truncated *nolO* gene due to a -1 frameshift mutation that is conserved among other geographically distant *S. fredii* strains. *Mol. Plant Microbe Interact.* **2002**, *15*, 150–159. <https://doi.org/10.1094/mpmi.2002.15.2.150>.
- López-Baena, F.J.; Vinardell, J.M.; Pérez-Montañó, F.; Crespo-Rivas, J.C.; Bellogín, R.A.; Espuny, M.R.; Ollero, F.J. Regulation and symbiotic significance of nodulation outer proteins secretion in *Sinorhizobium fredii* HH103. *Microbiology* **2008**, *154*, 1825–1836. <https://doi.org/10.1099/mic.0.2007/016337-0>.
- Acosta-Jurado, S.; Navarro-Gómez, P.; Murdoch, P.S.; Crespo-Rivas, J.C.; Jie, S.; Cuesta-Berrio, L.; Ruiz-Sainz, J.E.; Rodríguez-Carvajal, M.Á.; Vinardell, J.M. Exopolysaccharide production by *Sinorhizobium fredii* HH103 is repressed by genistein in a NodD1-dependent manner. *PLoS ONE* **2016**, *11*, e0160499. <https://doi.org/10.1371/journal.pone.0160499>.
- Acosta-Jurado, S.; Alias-Villegas, C.; Navarro-Gómez, P.; Almozara, A.; Rodríguez-Carvajal, M.A.; Medina, C.; Vinardell, J.M. *Sinorhizobium fredii* HH103 *syrM* inactivation affects the expression of a large number of genes, impairs nodulation with soybean and extends the host-range to *Lotus japonicus*. *Environ. Microbiol.* **2020**, *22*, 1104–1124. <https://doi.org/10.1111/1462-2920.14897>.
- Vinardell, J.M.; López-Baena, F.J.; Hidalgo, A.; Ollero, F.J.; Bellogín, R.; Espuny, M.R.; Temprano, F.; Romero, F.; Krishnan, H.B.; Pueppke, S.G.; et al. The effect of FITA mutations on the symbiotic properties of *Sinorhizobium fredii* varies in a chromosomal-background-dependent manner. *Arch. Microbiol.* **2004**, *181*, 144–154. <https://doi.org/10.1007/s00203-003-0635-3>.

8. Figurski, D.H.; Helinski, D.R. Replication of an origin containing derivative of plasmid RK2 dependent on a plasmid function provided in *trans*. *Proc. Natl. Acad. Sci. USA* **1979**, *76*, 1648–1652. <https://doi.org/10.1073/pnas.76.4.1648>.
